# Supplementary material for: A Phase 1 Two-Arm, Randomized, Double-Blind, Active-Controlled Study of Live, Oral Plasmid-Derived Adenovirus Type 4 and Type 7 Vaccines in Seronegative Adults
Source: MDPI journal article supplement (doi:10.3390/vaccines11061091), 2023-06-12
Supplement: s1 [file s1]

## SUPPLEMENTARY INFORMATION

**Supplemental Figure S1. Disposition of Study Subjects**

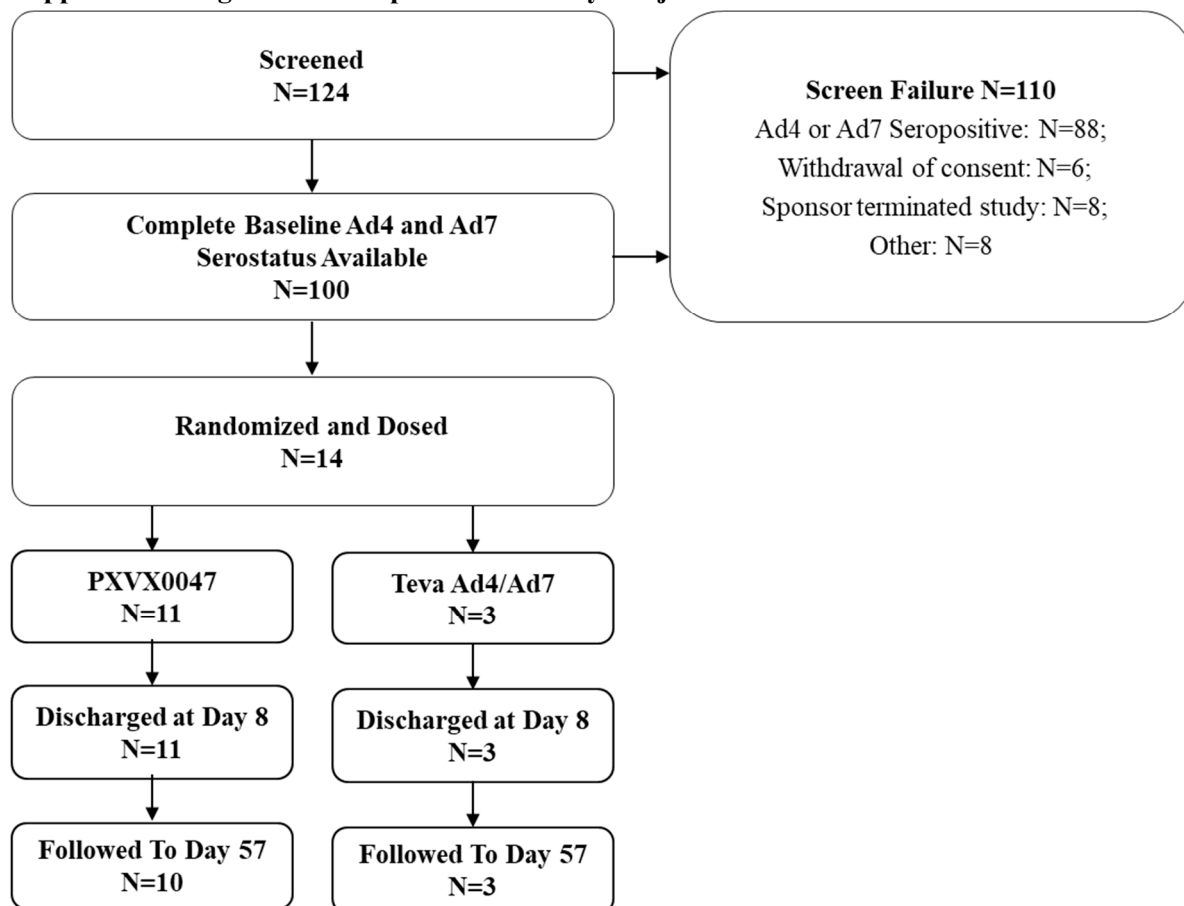

**Supplemental Table S1. Treatment-related solicited adverse events by time period**

|                     | Days 1-8         |                     | Days 8-15        |                     |
|---------------------|------------------|---------------------|------------------|---------------------|
| <b>Solicited AE</b> | PXVX0047<br>N=11 | Teva Ad4/Ad7<br>N=3 | PXVX0047<br>N=11 | Teva Ad4/Ad7<br>N=3 |
| <b>Any</b>          | <b>5 (45.5%)</b> | <b>2 (66.7%)</b>    | <b>3 (27.3%)</b> | <b>1 (33.3)</b>     |
| Nasal congestion    | 4 (36.4%)        | 1 (33.1%)           | 0                | 0                   |
| Headache            | 3 (27.3%)        | 0                   | 2 (18.2%)        | 1 (33.3%)           |
| Nausea              | 1 (9.1%)         | 1 (33.1%)           | 0                | 0                   |
| Sore Throat         | 1 (9.1%)         | 1 (33.1%)           | 1 (9.1%)         | 0                   |
| Vomiting            | 1 (9.1%)         | 1 (33.1%)           | 1 (9.1%)         | 0                   |
| Abdominal Pain      | 1 (9.1%)         | 0                   | 0                | 0                   |
| Chills              | 1 (9.1%)         | 0                   | 1 (9.1%)         | 0                   |
| Myalgia             | 1 (9.1%)         | 0                   | 0                | 0                   |
| Arthralgia          | 0                | 0                   | 0                | 0                   |
| Cough               | 0                | 0                   | 1 (9.1%)         | 0                   |
| Diarrhea            | 0                | 0                   | 1 (9.1%)         | 0                   |
| Dyspnea             | 0                | 0                   | 0                | 0                   |
| Fatigue             | 0                | 0                   | 0                | 0                   |
| Fever               | 0                | 0                   | 0                | 0                   |

**Supplemental Table S2. Seroconversion rates by timepoint, as measured by luciferase assay.**

| Serotype | Treatment group | Seroconversion by Day, n/N (%) |                |                 |                |                | Cumulative seroconversion rate |
|----------|-----------------|--------------------------------|----------------|-----------------|----------------|----------------|--------------------------------|
|          |                 | Day 8                          | Day 15         | Day 22          | Day 29         | Day 57         |                                |
| Ad4      | PXVX0047        | 0/11<br>(0)                    | 1/10<br>(10.0) | 4/11<br>(36.4)  | 4/11<br>(36.4) | 2/10<br>(20.0) | 4/11<br>(36.4)                 |
|          | Teva            | 0/3<br>(0)                     | 1/3<br>(33.3)  | 1/2<br>(50.0)   | 2/3<br>(66.7)  | 1/3<br>(33.3)  | 2/3<br>(66.7)                  |
| Ad7      | PXVX0047        | 0/11<br>(0)                    | 9/10<br>(90.0) | 10/11<br>(90.9) | 9/11<br>(81.8) | 7/10<br>(70.0) | 10/11<br>(90.9)                |
|          | Teva            | 0/3<br>(0)                     | 2/3<br>(66.7)  | 2/2<br>(100.0)  | 3/3<br>(100)   | 3/3<br>(100)   | 3/3<br>(100.0)                 |

Seroconversion was defined as a 4-fold or greater rise from baseline. At each timepoint, the denominator is the number of subjects for whom assay results are available. The cumulative seroconversion rate includes all subjects who met seroconversion at any post-vaccination timepoint.

**Supplemental Table S3. Ad4 and Ad7 serostatus at screening by luciferase assay**

|              | Ad7 +         | Ad7 -         | Total         |
|--------------|---------------|---------------|---------------|
| <b>Ad4 +</b> | 27<br>(23.1%) | 13<br>(11.1%) | 40<br>(34.2%) |
| <b>Ad4 -</b> | 42<br>(35.9%) | 35<br>(29.9%) | 77<br>(65.8%) |
| <b>Total</b> | 69<br>(59.0%) | 48<br>(41.0%) | 117<br>(100%) |

**Supplemental Table S4. Ad4 and Ad7 serostatus at screening by colorimetric assay**

|              | Ad7 +         | Ad7 -         | Total         |
|--------------|---------------|---------------|---------------|
| <b>Ad4 +</b> | 36<br>(36.0%) | 9<br>(9.0%)   | 45<br>(45.0%) |
| <b>Ad4 -</b> | 34<br>(34.0%) | 21<br>(21.0%) | 55<br>(55.0%) |
| <b>Total</b> | 70<br>(70.0%) | 30<br>(30.0%) | 100<br>(100%) |

**Supplemental Table S5. Neutralizing Antibodies by Timepoint: Geometric Mean Titers**

| Assay        | Treatment Group    | Serotype | Day              |                  |                        |                       |                        |                      | Peak*                  |
|--------------|--------------------|----------|------------------|------------------|------------------------|-----------------------|------------------------|----------------------|------------------------|
|              |                    |          | 1                | 8                | 15                     | 22                    | 29                     | 57                   |                        |
| Luciferase   | PXVX0047 (N=11)    | Ad4      | 2.5<br>(2.5-2.5) | 2.5<br>(2.5-2.5) | 4.9<br>(1.7-13.8)      | 7.7<br>(2.6-23.4)     | 6.6<br>(2.4-18.1)      | 3.9<br>(2.1-7.3)     | 10.5<br>(2.9-38.4)     |
|              |                    | Ad7      | 2.5<br>(2.5-2.5) | 3.6<br>(2.6-4.9) | 330.4<br>(64.8-1683.7) | 256.1<br>(66.7-983.8) | 158.4<br>(42.8-585.9)  | 67.5<br>(18.7-243.0) | 391.9<br>(90.7-1692.9) |
|              | Teva Ad4/Ad7 (N=3) | Ad4      | 2.5<br>(2.5-2.5) | 2.5<br>(2.5-2.5) | 6.4<br>(0.1-355.5)     | 36.2<br>(0.0->10000)  | 28.2<br>(0.1-9846.0)   | 12.3<br>(0.2-742.1)  | 34.8<br>(0.0->10000)   |
|              |                    | Ad7      | 2.5<br>(2.5-2.5) | 2.5<br>(2.5-2.5) | 65.3<br>(0.1->10000)   | 111.3<br>(0.2->10000) | 204.0<br>(12.4-3356.0) | 92.7<br>(16.8-512.2) | 217.1<br>(13.8-3403.7) |
| Colorimetric | PXVX0047 (N=11)    | Ad4      | 2.6<br>(2.0-3.3) | 2.7<br>(2.0-3.7) | 5.3<br>(2.3-12.3)      | 8.1<br>(3.7-18.0)     | 7.2<br>(3.2-16.1)      | 4.7<br>(2.3-9.6)     | 10.0<br>(3.9-25.2)     |
|              |                    | Ad7      | 2.2<br>(1.9-2.6) | 2.6<br>(1.9-3.4) | 105.2<br>(24.1-459.7)  | 82.1<br>(26.5-254.9)  | 53.8<br>(19.0-152.0)   | 28.8<br>(11.0-75.6)  | 115.6<br>(31.3-426.5)  |
|              | Teva Ad4/Ad7 (N=3) | Ad4      | 2.0<br>(2.0-2.0) | 2.6<br>(1.5-4.7) | 10.1<br>(0.7-139.9)    | 31.0<br>(0.0->10000)  | 24.8<br>(0.3-1935.0)   | 16.0<br>(0.6-462.9)  | 38.2<br>(0.5-2719.6)   |
|              |                    | Ad7      | 2.0<br>(2.0-2.0) | 2.0<br>(2.0-2.0) | 37.3<br>(0.3-4917.0)   | 54.1<br>(11.8-248.1)  | 85.8<br>(16.8-436.7)   | 46.3<br>(7.2-298.2)  | 97.2<br>(24.4-387.2)   |

\*Peak is calculated using the highest post-vaccination value for each subject

**Supplemental Table S6. Ad4 and Ad7 viral vaccine sequence strains**

| Vaccine  | Adenovirus component | Genbank accession # |
|----------|----------------------|---------------------|
| Wyeth    | Ad4                  | AY458656            |
| Wyeth    | Ad7                  | AY594256            |
| Teva     | Ad4                  | AY594254            |
| Teva     | Ad7                  | MH910669.1          |
| PXVX0047 | Ad4                  | MN936177            |
| PXVX0047 | Ad7                  | MN936178            |

Seroconversion was defined as a 4-fold or greater rise from baseline. N/A indicates data not available.

**Supplemental Table S7. Ad4 neutralization titers, as measured by luciferase assay.**

| Treatment group | Subject ID | Day 1 | Day 8 | Day 15 | Day 22 | Day 29 | Day 57 |
|-----------------|------------|-------|-------|--------|--------|--------|--------|
| PXVX0047        | 35/M       | 4     | 4     | 4      | 4      | 4      | 4      |
|                 | 21/F       | 4     | 4     | 4      | 18.3   | 38.9   | 12.3   |
|                 | 28/M       | 4     | 4     | 4      | 4      | 4      | 4      |
|                 | 23/F       | 4     | 4     | 256    | 52.4   | 13.1   | 4.1    |
|                 | 35/F       | 4     | 4     | 4      | 4      | 4      | 4      |
|                 | 20/F       | 4     | 4     | 4      | 4      | 4      | 4      |
|                 | 20/F       | 4     | 4     | 6.1    | 17.9   | 20.4   | 28.6   |
|                 | 33/M       | 4     | 4     | 4      | 4      | 4      | 4      |
|                 | 23/M       | 4     | 4     | N/A    | 326.3  | 174.2  | N/A    |
|                 | 28/M       | 4     | 4     | 4      | 4      | 4      | 4      |
|                 | 25/M       | 4     | 4     | 7.7    | 4.3    | 4      | 4      |
| Teva            | 22/F       | 4     | 4     | 4      | N/A    | 32.3   | 10.9   |
|                 | 27/F       | 4     | 4     | 41.3   | 523    | 277.3  | 67.6   |
|                 | 24/M       | 4     | 4     | 4      | 4      | 4      | 4      |

Seroconversion was defined as a 4-fold or greater rise from baseline. N/A indicates data not available.

**Supplemental Table S8. Ad7 neutralization titers, as measured by luciferase assay.**

| Treatment group | Subject ID | Day 1 | Day 8 | Day 15 | Day 22 | Day 29 | Day 57 |
|-----------------|------------|-------|-------|--------|--------|--------|--------|
| PXVX0047        | 35/M       | 4     | 4.7   | 2862.5 | 1330.4 | 936.7  | 305.8  |
|                 | 21/F       | 4     | 4     | 588.6  | 273.3  | 140.5  | 53.6   |
|                 | 28/M       | 4     | 4     | 183.8  | 328.8  | 321.6  | 202.9  |
|                 | 23/F       | 4     | 4     | 77.7   | 30.7   | 12.8   | 7.1    |
|                 | 35/F       | 4     | 4     | 4      | 4      | 4      | 4      |
|                 | 20/F       | 4     | 4     | 704.1  | 1328   | 1116.1 | 541.1  |
|                 | 20/F       | 4     | 4     | 203.7  | 242    | 171.9  | 123.6  |
|                 | 33/M       | 4     | 4.2   | 4438.6 | 2094.3 | 1040.9 | 284.8  |
|                 | 23/M       | 4     | 5.1   | N/A    | 538.7  | 273    | N/A    |
|                 | 28/M       | 4     | 4     | 4      | 4      | 4      | 4      |
|                 | 25/M       | 4     | 4     | 7.7    | 4.3    | 4      | 4      |
| Teva            | 22/F       | 4     | 4     | 597.1  | N/A    | 708.6  | 177.6  |
|                 | 27/F       | 4     | 4     | 4.3    | 67.6   | 78.8   | 45.1   |
|                 | 24/M       | 4     | 4     | 108.6  | 183.2  | 152.1  | 99.5   |

Seroconversion was defined as a 4-fold or greater rise from baseline. N/A indicates data not available.



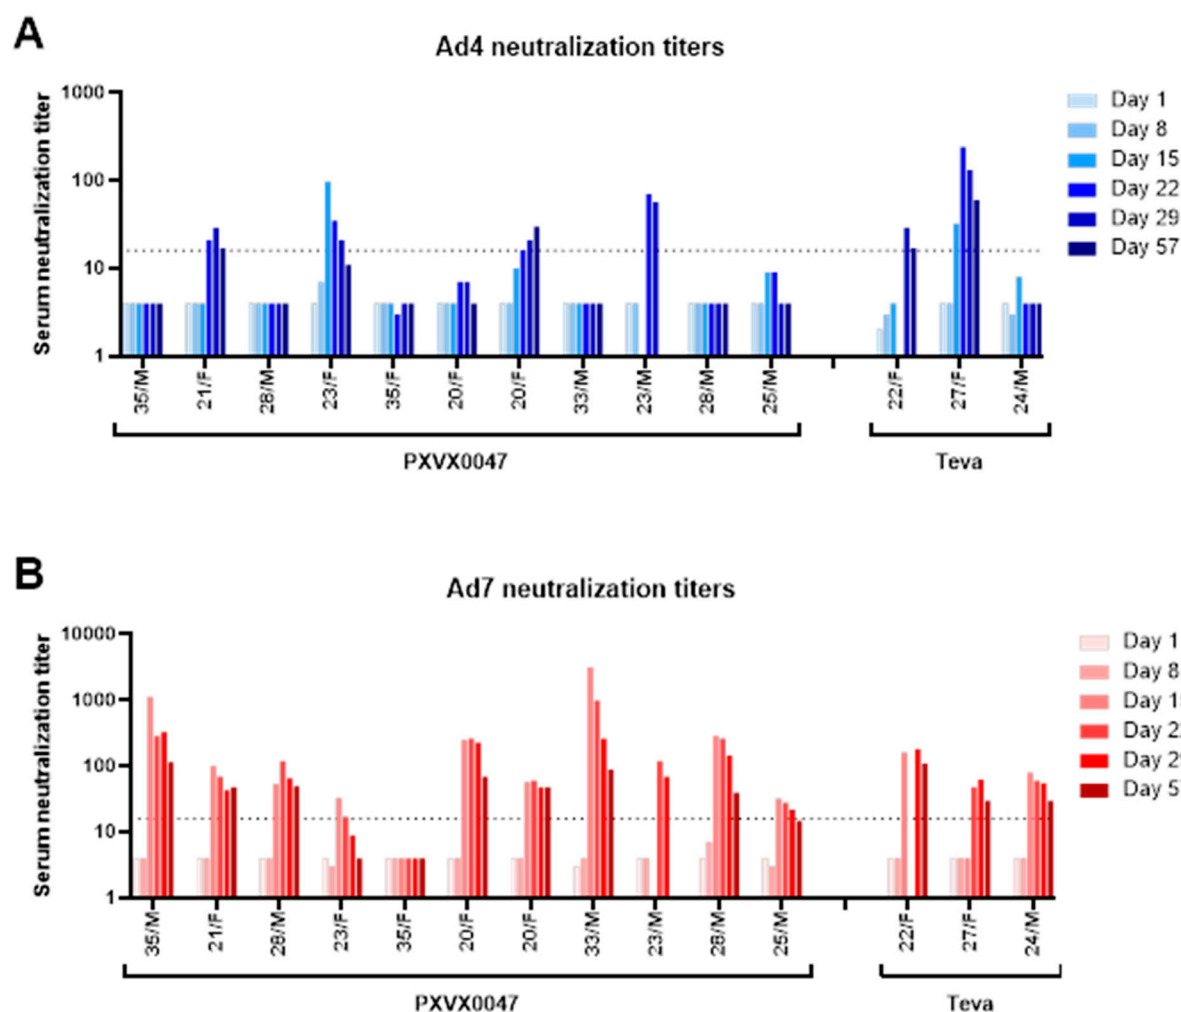

**Supplemental Figure S2. Ad7 neutralization titers, as measured by CPE assay.**

The age/sex of each study subject is shown on the horizontal axis. Groupings of subjects indicate treatment with PXVX0047 or Teva. The dashed horizontal line indicates the threshold for seroconversion, defined as a 4-fold or greater rise from baseline. Neutralization data is not available for Teva 22/F (Day 22) or 23/M (Days 15 and 57).

**Supplemental Table S9. Seroconversion rates by timepoint, as measured by colorimetric assay.**

| Serotype | Treatment Group | Seroconversion by Day, n/N (%) |                |                 |                |                | Cumulative seroconversion rate |
|----------|-----------------|--------------------------------|----------------|-----------------|----------------|----------------|--------------------------------|
|          |                 | Day 8                          | Day 15         | Day 22          | Day 29         | Day 57         |                                |
| Ad4      | PXVX0047        | 0/11<br>(0)                    | 1/10<br>(10.0) | 4/11 (36.4)     | 4/11<br>(36.4) | 2/10<br>(20.0) | 4/11<br>(36.4)                 |
|          | Teva            | 0/3 (0)                        | 1/3 (33.3)     | 1/2<br>(50.0)   | 2/3<br>(66.7)  | 2/3<br>(66.7)  | 2/3<br>(66.7)                  |
| Ad7      | PXVX0047        | 0/11<br>(0)                    | 9/10<br>(90.0) | 10/11<br>(90.9) | 9/11<br>(81.8) | 7/10<br>(70.0) | 10/11<br>(90.9)                |
|          | Teva            | 0/3 (0)                        | 2/3 (66.7)     | 2/2 (100.0)     | 3/3<br>(100)   | 3/3<br>(100)   | 3/3<br>(100.0)                 |

Seroconversion was defined as a 4-fold or greater rise from baseline. At each timepoint, the denominator is the number of subjects for whom assay results are available. The cumulative seroconversion rate includes all subjects who met seroconversion at any post-vaccination timepoint.
